# Supplementary material for: Accessing the challenges of descriptive morphology in Barychelidae and Theraphosidae through a morphometric approach (Araneae, Mygalomorphae)
Source: Research Square preprint supplement (doi:10.21203/rs.3.rs-8385809/v1), 2026-01-30
Supplement: Supplementary file 1 [file cebed5b6e1de636c5d524172.docx]

**Supplementary Material 1**

Table S1. Data collection and specimen sampling were used in this study. Marks: "X" indicate that the specimen was included in the respective analysis; "-" indicate that the specimen was not included in the respective analysis.

| **Collection** | ***Species*** | **Family** | **Subfamily** | **Maxilla** | **Labium** | **Eye**  **arrangement** |
| --- | --- | --- | --- | --- | --- | --- |
| QMS3254 | *Barycheloides* sp. | Barychelidae | Barychelinae | X | X | X |
| QMS17750 | *Barycheloides alluviophilus* | Barychelidae | Barychelinae | X | X | X |
| QMS19094 | *Barycheloides alluviophilus* | Barychelidae | Barychelinae | X | X | X |
| AMNH_ | *Barycheloides* sp. | Barychelidae | Barychelinae | X | X | X |
| QMS19100 | *Barycheloides concavus* | Barychelidae | Barychelinae | X | X | X |
| QMS19100a | *Barycheloides concavus* | Barychelidae | Barychelinae | X | X | X |
| QMS17753 | *Barycheloides rufofemoratus* | Barychelidae | Barychelinae | X | X | X |
| QMS19102 | *Barycheloides rufofemoratus* | Barychelidae | Barychelinae | X | X | X |
| QMS19097 | *Barycheloides rufofemoratus* | Barychelidae | Barychelinae | X | X | X |
| QMS17745 | *Barycheloides rufofemoratus* | Barychelidae | Barychelinae | X | X | X |
| MNHN8756 | *Cosmopelma decoratum* | Barychelidae | Sasoninae (neotropical) | X | X | X |
| IBSP220109 | *Cosmopelma decoratum* | Barychelidae | Sasoninae (neotropical) | X | X | X |
| RMCA127267 | *Cyphonisia anulata* | Barychelidae | Barychelinae | X | X | X |
| RMCA120071 | *Cyphonisia itombwensis* | Barychelidae | Barychelinae | X | X | X |

| RMCA129769 | *Cyphonisia itombwensis* | Barychelidae | Barychelinae | X | X | X |
| --- | --- | --- | --- | --- | --- | --- |
| RMCA135618 | *Cyphonisia itombwensis* | Barychelidae | Barychelinae | X | X | X |
| RMCA135628 | *Cyphonisia itombwensis* | Barychelidae | Barychelinae | X | X | X |
| RMCA144496 | *Cyphonisia itombwensis* | Barychelidae | Barychelinae | X | X | X |
| RMCA212501 | *Cyphonisia maculata* | Barychelidae | Barychelinae | X | X | X |
| RMCA140818 | *Cyphonisia maculata* | Barychelidae | Barychelinae | X | X | X |
| RMCA126815 | *Cyphonisia obesa* | Barychelidae | Barychelinae | X | X | X |
| RMCA232393 | *Cyphonisia obesa* | Barychelidae | Barychelinae | X | X | X |
| RMCA232396 | *Cyphonisia obesa* | Barychelidae | Barychelinae | X | X | X |
| RMCA232400 | *Cyphonisia obesa* | Barychelidae | Barychelinae | X | X | X |
| RMCA232399 | *Cyphonisia obesa* | Barychelidae | Barychelinae | X | X | X |
| RMCA232397 | *Cyphonisia obesa* | Barychelidae | Barychelinae | X | X | X |
| RMCA227826 | *Cyphonisia obesa* | Barychelidae | Barychelinae | X | X | X |
| RMCA151744 | *Cyphonisia obesa* | Barychelidae | Barychelinae | X | X | X |
| RMCA27055 | *Cyphonisia obesa* | Barychelidae | Barychelinae | X | X | X |
| RMCA146507 | *Cyphonisia obesa* | Barychelidae | Barychelinae | X | X | X |
| QMS51468 | *Encyocrypta* sp. | Barychelidae | Barychelinae | X | X | X |
| QMS7131a | *Encyocrypta* sp. | Barychelidae | Barychelinae | X | X | X |
| QMS7131b | *Encyocrypta* sp. | Barychelidae | Barychelinae | X | X | X |
| QMS7131c | *Encyocrypta* sp. | Barychelidae | Barychelinae | X | X | X |
| QMS15484 | *Encyocrypta* sp. | Barychelidae | Barychelinae | X | X | X |
| QMS15485 | *Encyocrypta* sp. | Barychelidae | Barychelinae | X | X | X |
| QMS15486 | *Encyocrypta* sp. | Barychelidae | Barychelinae | X | X | X |
| QMS19092 | *Encyocrypta* sp. | Barychelidae | Barychelinae | X | X | X |
| QMS34165 | *Encyocrypta* sp. | Barychelidae | Barychelinae | X | X | X |
| QMS34191 | *Encyocrypta* sp. | Barychelidae | Barychelinae | X | X | X |
| IBSP111281 | *Neodiplothele* sp. | Barychelidae | Sasoninae (neotropical) | X | X | X |
| IBSP108004 | *Neodiplothele* sp. | Barychelidae | Sasoninae (neotropical) | X | X | X |
| IBSP108005 | *Neodiplothele* sp. | Barychelidae | Sasoninae (neotropical) | X | X | X |
| IBSP108006 | *Neodiplothele* sp. | Barychelidae | Sasoninae (neotropical) | X | X | X |
| IBSP165156 | *Neodiplothele* sp. | Barychelidae | Sasoninae (neotropical) | X | X | X |
| IBSP165157 | *Neodiplothele* sp. | Barychelidae | Sasoninae (neotropical) | X | X | X |
| IBSP165158 | *Neodiplothele* sp. | Barychelidae | Sasoninae (neotropical) | X | X | X |
| IBSP165159 | *Neodiplothele* sp. | Barychelidae | Sasoninae (neotropical) | X | X | X |
| IBSP165160 | *Neodiplothele* sp. | Barychelidae | Sasoninae (neotropical) | X | X | X |
| IBSP165162 | *Neodiplothele* sp. | Barychelidae | Sasoninae (neotropical) | X | X | X |
| QMS_ | *Idiommata blackwalli* | Barychelidae | Barychelinae | X | X | X |
| QMS_AR52 | *Idiommata blackwalli* | Barychelidae | Barychelinae | X | X | X |

| QMS_ | *Idiommata blackwalli* | Barychelidae | Barychelinae | X | X | X |
| --- | --- | --- | --- | --- | --- | --- |
| QMS_ | *Idiommata blackwalli* | Barychelidae | Barychelinae | X | X | X |
| QMS_ | *Idiommata blackwalli* | Barychelidae | Barychelinae | X | X | X |
| QMS_ | *Idiommata blackwalli* | Barychelidae | Barychelinae | X | X | X |
| QMS_ | *Idiommata blackwalli* | Barychelidae | Barychelinae | X | X | X |
| QMS_AR52 | *Idiommata blackwalli* | Barychelidae | Barychelinae | X | - | X |
| QMS_AR53 | *Idiommata blackwalli* | Barychelidae | Barychelinae | X | - | X |
| QMS12523 | *Idioctis helva* | Barychelidae | Barychelinae | X | X | X |
| QMS_ | *Idioctis helva* | Barychelidae | Barychelinae | X | X | X |
| QMS_ | *Idioctis helva* | Barychelidae | Barychelinae | X | X | X |
| QMS12521 | *Idioctis helva* | Barychelidae | Barychelinae | X | X | X |
| QMS12522 | *Idioctis helva* | Barychelidae | Barychelinae | X | X | X |
| QMS12527 | *Idioctis helva* | Barychelidae | Barychelinae | X | X | X |
| QMS12530 | *Idioctis helva* | Barychelidae | Barychelinae | X | X | X |
| QMS13529a | *Idioctis helva* | Barychelidae | Barychelinae | X | X | X |
| QMS13529b | *Idioctis helva* | Barychelidae | Barychelinae | X | X | X |
| QMS54433 | *Mandjela commoni* | Barychelidae | Barychelinae | X | X | X |
| QMS1923 | *Mandjela commoni* | Barychelidae | Barychelinae | X | X | X |
| QMS1926 | *Mandjela commoni* | Barychelidae | Barychelinae | X | X | X |
| QMS1928 | *Mandjela commoni* | Barychelidae | Barychelinae | X | X | X |

| QMS1932 | *Mandjela commoni* | Barychelidae | Barychelinae | X | X | X |
| --- | --- | --- | --- | --- | --- | --- |
| QMS1979 | *Mandjela commoni* | Barychelidae | Barychelinae | X | X | X |
| QMS1981 | *Mandjela commoni* | Barychelidae | Barychelinae | X | X | X |
| QMS18357 | *Mandjela commoni* | Barychelidae | Barychelinae | X | X | X |
| QMS19549 | *Mandjela commoni* | Barychelidae | Barychelinae | X | X | X |
| QMS19692 | *Mandjela commoni* | Barychelidae | Barychelinae | X | X | X |
| IBSP161832 | *Neodiplothele irregulares* | Barychelidae | Sasoninae (neotropical) | X | X | X |
| IBSP 161835 | *Neodiplothele irregulares* | Barychelidae | Sasoninae (neotropical) | X | X | X |
| IBSP 161836 | *Neodiplothele irregulares* | Barychelidae | Sasoninae (neotropical) | X | X | X |
| IBSP 161837 | *Neodiplothele irregulares* | Barychelidae | Sasoninae (neotropical) | X | X | X |
| IBSP 161838 | *Neodiplothele irregulares* | Barychelidae | Sasoninae (neotropical) | X | X | X |
| IBSP 161848 | *Neodiplothele irregulares* | Barychelidae | Sasoninae (neotropical) | X | X | X |
| IBSP 161849 | *Neodiplothele irregulares* | Barychelidae | Sasoninae (neotropical) | X | X | X |
| IBSP 161850 | *Neodiplothele irregulares* | Barychelidae | Sasoninae (neotropical) | X | X | X |
| IBSP 165102 | *Neodiplothele irregulares* | Barychelidae | Sasoninae (neotropical) | X | X | X |
| IBSP 165117 | *Neodiplothele irregulares* | Barychelidae | Sasoninae (neotropical) | X | X | X |
| QMS8287 | *Nihoa bisianumu* | Barychelidae | Barychelinae | X | X | X |
| QMS8287a | *Nihoa bisianumu* | Barychelidae | Barychelinae | X | X | X |
| QMS8287b | *Nihoa bisianumu* | Barychelidae | Barychelinae | X | X | X |
| QMS8278d | *Nihoa karawari* | Barychelidae | Barychelinae | X | X | X |
| QMS8278 | *Nihoa karawari* | Barychelidae | Barychelinae | X | X | X |
| QMS827a | *Nihoa karawari* | Barychelidae | Barychelinae | X | X | X |
| QMS827c | *Nihoa karawari* | Barychelidae | Barychelinae | X | X | X |
| QMS827b | *Nihoa karawari* | Barychelidae | Barychelinae | X | X | X |
| QMS19125 | *Nihoa pictipes* | Barychelidae | Barychelinae | - | - | X |
| QMS19062 | *Nihoa pictipes* | Barychelidae | Barychelinae | - | - | X |
| QMS54524 | *Ozycrypta* sp. | Barychelidae | Barychelinae | X | X | X |
| QMS27420 | *Ozycrypta* sp. | Barychelidae | Barychelinae | X | X | X |
| QMS51975 | *Ozycrypta* sp. | Barychelidae | Barychelinae | X | X | X |
| QMS57952 | *Ozycrypta* sp. | Barychelidae | Barychelinae | X | X | X |
| QMS59555 | *Ozycrypta* sp. | Barychelidae | Barychelinae | X | X | X |
| QMS63101 | *Ozycrypta* sp. | Barychelidae | Barychelinae | X | X | X |
| QMS59297 | *Ozycrypta* sp. | Barychelidae | Barychelinae | X | X | X |
| QMS59297B | *Ozycrypta* sp. | Barychelidae | Barychelinae | X | X | X |
| QMS27386 | *Ozycrypta* sp. | Barychelidae | Barychelinae | X | X | X |
| QMS46898 | *Ozycrypta* sp. | Barychelidae | Barychelinae | X | X | X |
| MNRJ0236 | *Paracenobiopelma gerecormophilum* | Barychelidae | Sasoninae (neotropical) | X | X | X |
| MNRJ0236 | *Paracenobiopelma gerecormophilum* | Barychelidae | Sasoninae (neotropical) | X | X | X |
| MNRJ0236 | *Paracenobiopelma gerecormophilum* | Barychelidae | Sasoninae (neotropical) | X | X | X |
| RMCA127641 | *Pisenor leleupi* | Barychelidae | Barychelinae | X | X | X |
| RMCA093110 | *Pisenor leleupi* | Barychelidae | Barychelinae | X | X | X |
| RMCA139865 | *Pisenor maculata* | Barychelidae | Barychelinae | X | X | X |
| MNHN1876 | *Pisenor notius* | Barychelidae | Barychelinae | X | X | X |
| MNHN4529 | *Pisenor notius* | Barychelidae | Barychelinae | X | X | X |
| RMCA09253 | *Pisenor plicata* | Barychelidae | Barychelinae | X | X | X |
| RMCA092517 | *Pisenor tenuistylus* | Barychelidae | Barychelinae | X | X | X |
| RMCA092518 | *Pisenor tenuistylus* | Barychelidae | Barychelinae | X | X | X |
| RMCA139899 | *Pisenor upembana* | Barychelidae | Barychelinae | X | X | X |
| RMCA13969 | *Pisenor upembana* | Barychelidae | Barychelinae | X | X | X |
| QMS27870 | *Seoqcrypta jakara* | Barychelidae | Barychelinae | X | X | X |
| QMS95219 | *Seoqcrypta jakara* | Barychelidae | Barychelinae | X | X | X |
| QMS_ | *Seoqcrypta jakara* | Barychelidae | Barychelinae | X | X | X |
| QMS_ | *Seoqcrypta jakara* | Barychelidae | Barychelinae | X | X | X |
| QMS_ | *Seoqcrypta jakara* | Barychelidae | Barychelinae | X | X | X |
| QMS_ | *Seoqcrypta jakara* | Barychelidae | Barychelinae | X | X | X |
| QMS19542 | *Seoqcrypta jakara* | Barychelidae | Barychelinae | X | X | X |
| QMS20026 | *Seoqcrypta jakara* | Barychelidae | Barychelinae | X | X | X |
| QMS20476 | *Seoqcrypta jakara* | Barychelidae | Barychelinae | X | X | X |
| QMS20474 | *Seoqcrypta jakara* | Barychelidae | Barychelinae | X | X | X |
| SMNK 3528 | *Strophaeus quillacinga* | Barychelidae | Barychelinae | X | X | X |
| SMNK 3529 | *Strophaeus quillacinga* | Barychelidae | Barychelinae | X | X | X |
| SMNK 3530 | *Strophaeus quillacinga* | Barychelidae | Barychelinae | X | X | X |
| SMNK 3531 | *Strophaeus quillacinga* | Barychelidae | Barychelinae | X | X | X |
| SMNK 3532 | *Strophaeus quillacinga* | Barychelidae | Barychelinae | X | X | X |
| SMNK 3533 | *Strophaeus quillacinga* | Barychelidae | Barychelinae | X | X | X |
| SMNK 3534 | *Strophaeus quillacinga* | Barychelidae | Barychelinae | X | X | X |
| SMNK 3528 | *Strophaeus quillacinga* | Barychelidae | Barychelinae | X | X | X |
| SMNK 3533 | *Strophaeus quillacinga* | Barychelidae | Barychelinae | X | X | X |
| SMNK 3533 | *Strophaeus quillacinga* | Barychelidae | Barychelinae | X | X | X |
| QMS11211 | *Sason colemani* | Barychelidae | Sasoninae | X | X | X |
| QMS1312 | *Sason colemani* | Barychelidae | Sasoninae | X | X | X |
| QMS9680 | *Sason colemani* | Barychelidae | Sasoninae | X | X | X |
| QMS11193 | *Sason colemani* | Barychelidae | Sasoninae | X | X | X |
| QMS11203 | *Sason colemani* | Barychelidae | Sasoninae | X | X | X |
| QMS11206 | *Sason colemani* | Barychelidae | Sasoninae | X | X | X |
| QMS11207 | *Sason colemani* | Barychelidae | Sasoninae | X | X | X |
| QMS11208 | *Sason colemani* | Barychelidae | Sasoninae | X | X | X |
| QMS11212 | *Sason_colemani* | Barychelidae | Sasoninae | X | X | X |
| QMS11208b | *Sason colemani* | Barychelidae | Sasoninae | X | X | X |
| MNHN | *Sason robustum* | Barychelidae | Sasoninae | X | X | X |
| NHM1899.1.17.1 | *Sason robustum* | Barychelidae | Sasoninae | X | X | X |
| MNHN | *Sason robustum* | Barychelidae | Sasoninae | X | X | X |
| MNHN | *Sason robustum* | Barychelidae | Sasoninae | X | X | X |
| MNHN | *Sason robustum* | Barychelidae | Sasoninae | X | X | X |
| MNHN | *Sason robustum* | Barychelidae | Sasoninae | X | X | X |
| MNHN | *Sason robustum* | Barychelidae | Sasoninae | X | X | X |
| MNHN | *Sason robustum* | Barychelidae | Sasoninae | X | X | X |
| MNHN | *Sason robustum* | Barychelidae | Sasoninae | X | X | X |
| MNHN | *Sason robustum* | Barychelidae | Sasoninae | X | X | X |
| RMCA57324 | *Sipalolasma warnantea* | Barychelidae | Barychelinae | X | X | X |
| RMCA122789 | *Sipalolasma warnantea* | Barychelidae | Barychelinae | X | X | X |
| RMCA128137 | *Sipalolasma warnantea* | Barychelidae | Barychelinae | X | X | X |
| RMCA3489 | *Sipalolasma warnantea* | Barychelidae | Barychelinae | X | X | X |
| RMCA120051 | *Sipalolasma warnantea* | Barychelidae | Barychelinae | X | X | X |
| RMCA120344 | *Sipalolasma warnantea* | Barychelidae | Barychelinae | X | X | X |
| QMS63032 | *Trittame loki* | Barychelidae | Barychelinae | X | X | X |
| QMS1611 | *Trittame loki* | Barychelidae | Barychelinae | X | X | X |
| QMS25143 | *Trittame loki* | Barychelidae | Barychelinae | X | X | X |
| QMS25143A | *Trittame loki* | Barychelidae | Barychelinae | X | X | X |
| QMS25931 | *Trittame loki* | Barychelidae | Barychelinae | X | X | X |
| QMS2593A | *Trittame loki* | Barychelidae | Barychelinae | X | X | X |
| QMS53004 | *Trittame loki* | Barychelidae | Barychelinae | X | X | X |
| QMS59962 | *Trittame loki* | Barychelidae | Barychelinae | X | X | X |
| QMS56446 | *Trittame mccolli* | Barychelidae | Barychelinae | X | X | X |
| QMS27401 | *Trittame mccolli* | Barychelidae | Barychelinae | X | X | X |
| NHM1899.3.14.4-13 | *Cyrtogrammomma monticola* | Theraphosidae | *incertae sedis* | X | X | X |
| NHM1899.3.14.4-13 | *Cyrtogrammomma monticola* | Theraphosidae | *incertae sedis* | X | X | X |
| IBSP166186 | *Cyrtogrammomma frevo* | Theraphosidae | *incertae sedis* | X | X | X |
| IBSP165145 | *Cyrtogrammomma frevo* | Theraphosidae | *incertae sedis* | X | X | X |
| IBSP111662 | *Cyrtogrammomma frevo* | Theraphosidae | *incertae sedis* | X | X | X |
| IBSP111663 | *Cyrtogrammomma frevo* | Theraphosidae | *incertae sedis* | X | X | X |
| IBSP111664 | *Cyrtogrammomma frevo* | Theraphosidae | *incertae sedis* | X | X | X |
| IBSP111665 | *Cyrtogrammomma frevo* | Theraphosidae | *incertae sedis* | X | X | X |
| IBSP111666 | *Cyrtogrammomma frevo* | Theraphosidae | *incertae sedis* | X | X | X |
| IBSP111667 | *Cyrtogrammomma frevo* | Theraphosidae | *incertae sedis* | X | X | X |
| IBSP111668 | *Cyrtogrammomma frevo* | Theraphosidae | *incertae sedis* | X | X | X |
| IBSP131715 | *Cyrtogrammomma frevo* | Theraphosidae | *incertae sedis* | X | X | X |
| MPEG007530 | *Holothele longipes*. | Theraphosidae | Ischnocolinae sensu stricto | X | X | X |
| MPEG007534 | *Holothele longipes*. | Theraphosidae | Ischnocolinae sensu stricto | X | X | X |
| MPEG007523 | *Holothele longipes*. | Theraphosidae | Ischnocolinae sensu stricto | X | X | X |
| MPEG007519 | *Holothele longipes*. | Theraphosidae | Ischnocolinae sensu stricto | X | X | X |
| MPEG007528 | *Holothele longipes*. | Theraphosidae | Ischnocolinae sensu stricto | X | X | X |
| MPEG000211 | *Holothele longipes*. | Theraphosidae | Ischnocolinae sensu stricto | X | X | X |
| MPEG007515 | *Holothele longipes*. | Theraphosidae | Ischnocolinae sensu stricto | X | X | X |
| MPEG001005 | *Holothele longipes*. | Theraphosidae | Ischnocolinae sensu stricto | X | X | X |
| MPEG000982 | *Holothele longipes*. | Theraphosidae | Ischnocolinae sensu stricto | X | X | X |
| MPEG008626 | *Holothele longipes*. | Theraphosidae | Ischnocolinae sensu stricto | X | X | X |
| CAD1024 | *Dolichothele* sp. | Theraphosidae | Ischnocolinae latu sensu | X | X | X |
| CAD1026 | *Dolichothele* sp*.* | Theraphosidae | Ischnocolinae latu sensu | X | X | X |
| CAD1504 | *Dolichothele* sp. | Theraphosidae | Ischnocolinae latu sensu | X | X | X |
| CAD1508 | *Dolichothele* sp*.* | Theraphosidae | Ischnocolinae latu sensu | X | X | X |
| CAD1015 | *Dolichothele* sp. | Theraphosidae | Ischnocolinae latu sensu | X | X | X |
| CAD1007 | *Dolichothele* sp. | Theraphosidae | Ischnocolinae latu sensu | X | X | X |
| CAD1021 | *Dolichothele* sp. | Theraphosidae | Ischnocolinae latu sensu | X | X | X |
| CAD1012 | *Dolichothele* sp. | Theraphosidae | Ischnocolinae latu sensu | X | X | X |
| CAD1014 | *Dolichothele* sp. | Theraphosidae | Ischnocolinae latu sensu | X | X | X |
| CAD1512 | *Dolichothele* sp. | Theraphosidae | Ischnocolinae latu sensu | X | X | X |
| CAD247 | *Tmesiphantes* sp. | Theraphosidae | Ischnocolinae latu sensu | X | X | X |
| CAD301 | *Tmesiphantes* sp. | Theraphosidae | Ischnocolinae latu sensu | X | X | X |
| CAD580 | *Tmesiphantes* sp. | Theraphosidae | Ischnocolinae latu sensu | X | X | X |
| CAD581 | *Tmesiphantes* sp. | Theraphosidae | Ischnocolinae latu sensu | X | X | X |
| CAD080 | *Tmesiphantes* sp. | Theraphosidae | Ischnocolinae latu sensu | X | X | X |
| CAD593 | *Tmesiphantes* sp. | Theraphosidae | Ischnocolinae latu sensu | X | X | X |
| CAD089 | *Tmesiphantes* sp. | Theraphosidae | Ischnocolinae latu sensu | X | X | X |
| CAD011 | *Tmesiphantes* sp. | Theraphosidae | Ischnocolinae latu sensu | X | X | X |
| CAD575 | *Tmesiphantes* sp. | Theraphosidae | Theraphosinae | X | X | X |
| Dirk Weinmann private collection | *Trichopelma* sp. | Theraphosidae | Ischnocolinae sensu stricto | X | X | X |
| Dirk Weinmann private collection | *Trichopelma* sp. | Theraphosidae | Ischnocolinae sensu stricto | X | X | X |
| Dirk Weinmann private collection | *Trichopelma* sp. | Theraphosidae | Ischnocolinae sensu stricto | X | X | X |
| Dirk Weinmann private collection | *Trichopelma* sp. | Theraphosidae | Ischnocolinae sensu stricto | X | X | X |
| Dirk Weinmann private collection | *Trichopelma* sp. | Theraphosidae | Ischnocolinae sensu stricto | X | X | X |
| Dirk Weinmann private collection | *Trichopelma* sp. | Theraphosidae | Ischnocolinae sensu stricto | X | X | X |
| Dirk Weinmann private collection | *Trichopelma* sp. | Theraphosidae | Ischnocolinae sensu stricto | X | X | X |
| Dirk Weinmann private collection | *Trichopelma* sp. | Theraphosidae | Ischnocolinae sensu stricto | X | X | X |
| CAD1167 | *Sickius longibulbi* | Theraphosidae | Schismatothelinae | X | X | X |
| CAD1164 | *Sickius longibulbi* | Theraphosidae | Schismatothelinae | X | X | X |
| CAD1174 | *Sickius longibulbi* | Theraphosidae | Schismatothelinae | X | X | X |
| CAD1161 | *Sickius longibulbi* | Theraphosidae | Schismatothelinae | X | X | X |
| CAD1162 | *Sickius longibulbi* | Theraphosidae | Schismatothelinae | - | X | X |
| CAD1166 | *Sickius longibulbi* | Theraphosidae | Schismatothelinae | X | X | X |
| DZUB1684 | *Sickius longibulbi* | Theraphosidae | Schismatothelinae | X | X | X |
| DZUB 284 | *Sickius longibulbi* | Theraphosidae | Schismatothelinae | X | - | - |
| DZUB 4365 | *Sickius longibulbi* | Theraphosidae | Schismatothelinae | X | X | X |
| CAD1563 | *Sickius longibulbi* | Theraphosidae | Schismatothelinae | X | X | X |
| CAD1564 | *Sickius longibulbi* | Theraphosidae | Schismatothelinae | X | X | X |
| CAD960 | *Catumiri* sp. | Theraphosidae | Ischnocolinae latu sensu | X | X | X |
| CAD961 | *Catumiri* sp. | Theraphosidae | Ischnocolinae latu sensu | X | X | X |
| CAD959 | *Catumiri* sp. | Theraphosidae | Ischnocolinae latu sensu | X | X | X |
| CAD1275 | *Catumiri* sp. | Theraphosidae | Ischnocolinae latu sensu | X | X | X |
| CAD784 | *Catumiri* sp. | Theraphosidae | Ischnocolinae latu sensu | X | X | X |
| CAD785 | *Catumiri* sp. | Theraphosidae | Ischnocolinae latu sensu | X | X | X |
| MPEG05544 | *Guyruita* sp. | Theraphosidae | Schismatothelinae | X | X | X |
| MPEG023311 | *Guyruita* sp. | Theraphosidae | Schismatothelinae | X | X | X |
| MPEG023305 | *Guyruita* sp. | Theraphosidae | Schismatothelinae | X | X | X |
| MPEG05543 | *Guyruita* sp. | Theraphosidae | Schismatothelinae | X | X | X |
| MPEG05542 | *Guyruita* sp. | Theraphosidae | Schismatothelinae | X | X | X |
| MPEG023303 | *Guyruita* sp. | Theraphosidae | Schismatothelinae | X | X | X |
| MPEG055504 | *Guyruita* sp. | Theraphosidae | Schismatothelinae | X | X | X |
| MPEG05547 | *Guyruita* sp. | Theraphosidae | Schismatothelinae | X | X | - |
| MPEG023312 | *Guyruita* sp*.* | Theraphosidae | Schismatothelinae | - | X | X |
| MPEG023306 | *Guyruita* sp*.* | Theraphosidae | Schismatothelinae | X | X | X |
| MPEG023300 | *Guyruita* sp*.* | Theraphosidae | Schismatothelinae | - | - | X |

**Supplementary Material 2 Regression analyses**

**Maxillae**

Regression Analysis: Regression Dependent variable(s): Maxillae:

ProcCoord1 ProcCoord2 ProcCoord3 ProcCoord4 ProcCoord5 ProcCoord6 ProcCoord7 ProcCoord8

Independent variable(s): Maxillae:

Centroid Size

Total sample size: 251

Regression Coefficients

|  | Centroid Size |
| --- | --- |
| x1 | 0,00008647 |
| y1 | 0,00008660 |
| x2 | 0,00004570 |

| y2 | 0,00003774 |
| --- | --- |
| x3 | -0,00010317 |
| y3 | 0,00000755 |
| x4 | -0,00002900 |
| y4 | -0,00013189 |

| Sums of squares |  |
| --- | --- |
| Total SS: | 1,00497680 |
| Predicted SS: | 0,01923381 |
| Residual SS: | 0,98574299 |

% predicted: 1,9139%

Permutation test against the null hypothesis of independence Number of randomization rounds: 10000

P-value: 0,0033

**Eye arrangement**

Regression Analysis: Regression

Dependent variable(s): Eyes:

ProcCoord1 ProcCoord2 ProcCoord3 ProcCoord4

ProcCoord5 ProcCoord6 ProcCoord7 ProcCoord8 ProcCoord9 ProcCoord10 ProcCoord11 ProcCoord12

Independent variable(s): Eyes:

Centroid Size

Total sample size: 255

Regression Coefficients

|  | Centroid Size |
| --- | --- |
| x1 | -0,00004178 |
| y1 | 0,00005994 |
| x2 | -0,00014861 |
| y2 | -0,00020914 |
| x3 | 0,00004296 |
| y3 | 0,00015579 |
| x4 | -0,00003905 |
| y4 | 0,00014982 |
| x5 | 0,00013572 |
| y5 | -0,00019197 |

x6 0,00005076

y6 0,00003556

| Sums of squares |  |
| --- | --- |
| Total SS: | 8,79924915 |
| Predicted SS: | 0,31120705 |
| Residual SS: | 8,48804210 |

% predicted: 3,5367%

Permutation test against the null hypothesis of independence Number of randomization rounds: 10000

P-value: 0,0015

**Supplementary Material 3 Transformation grids**


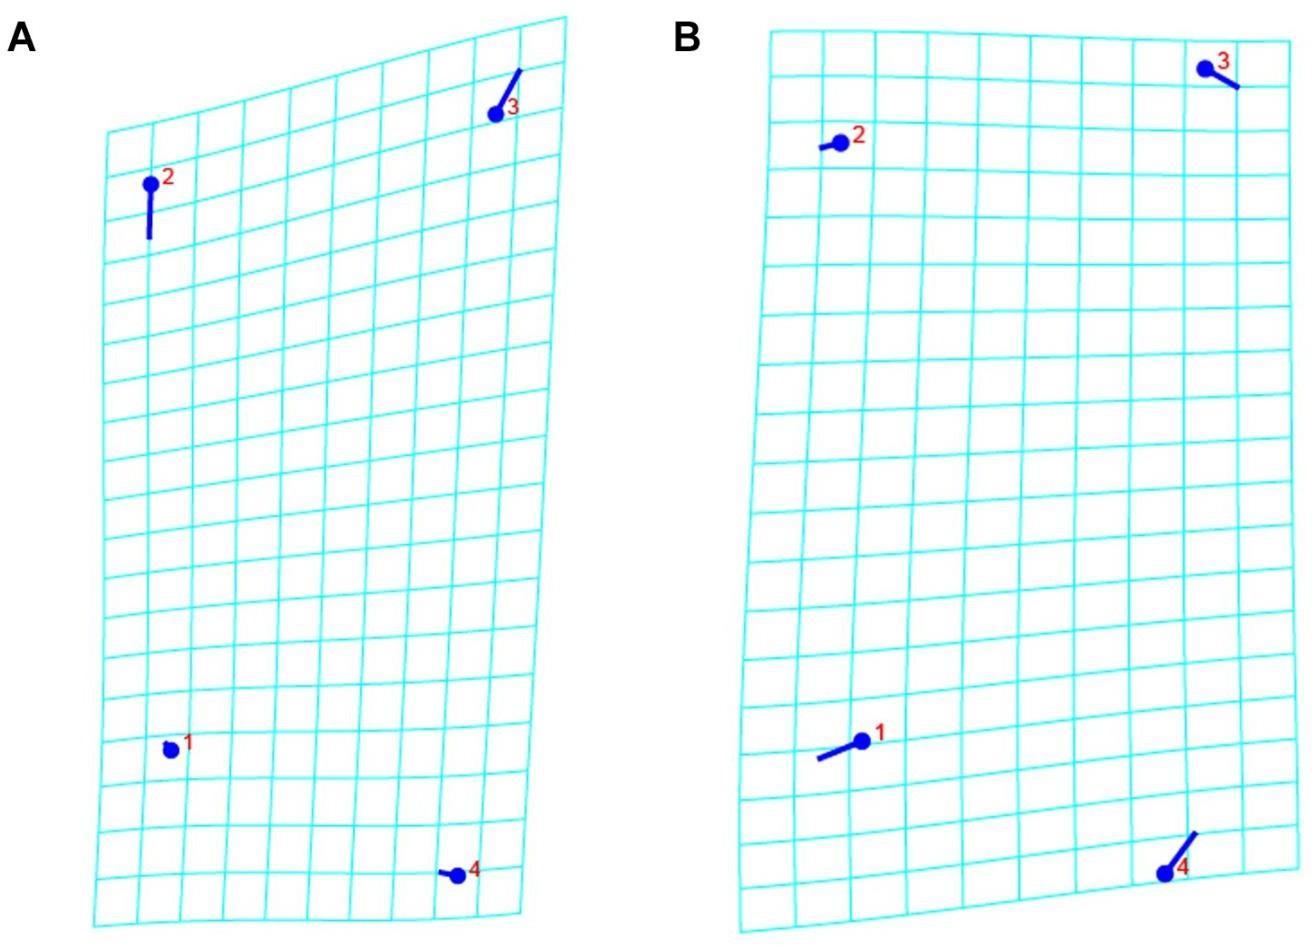


Figure S1. Transformation grid of maxilla. (A) Warp grid represents principal component 1 (PC1). (B) Warp grid represents principal component 2 (PC2).


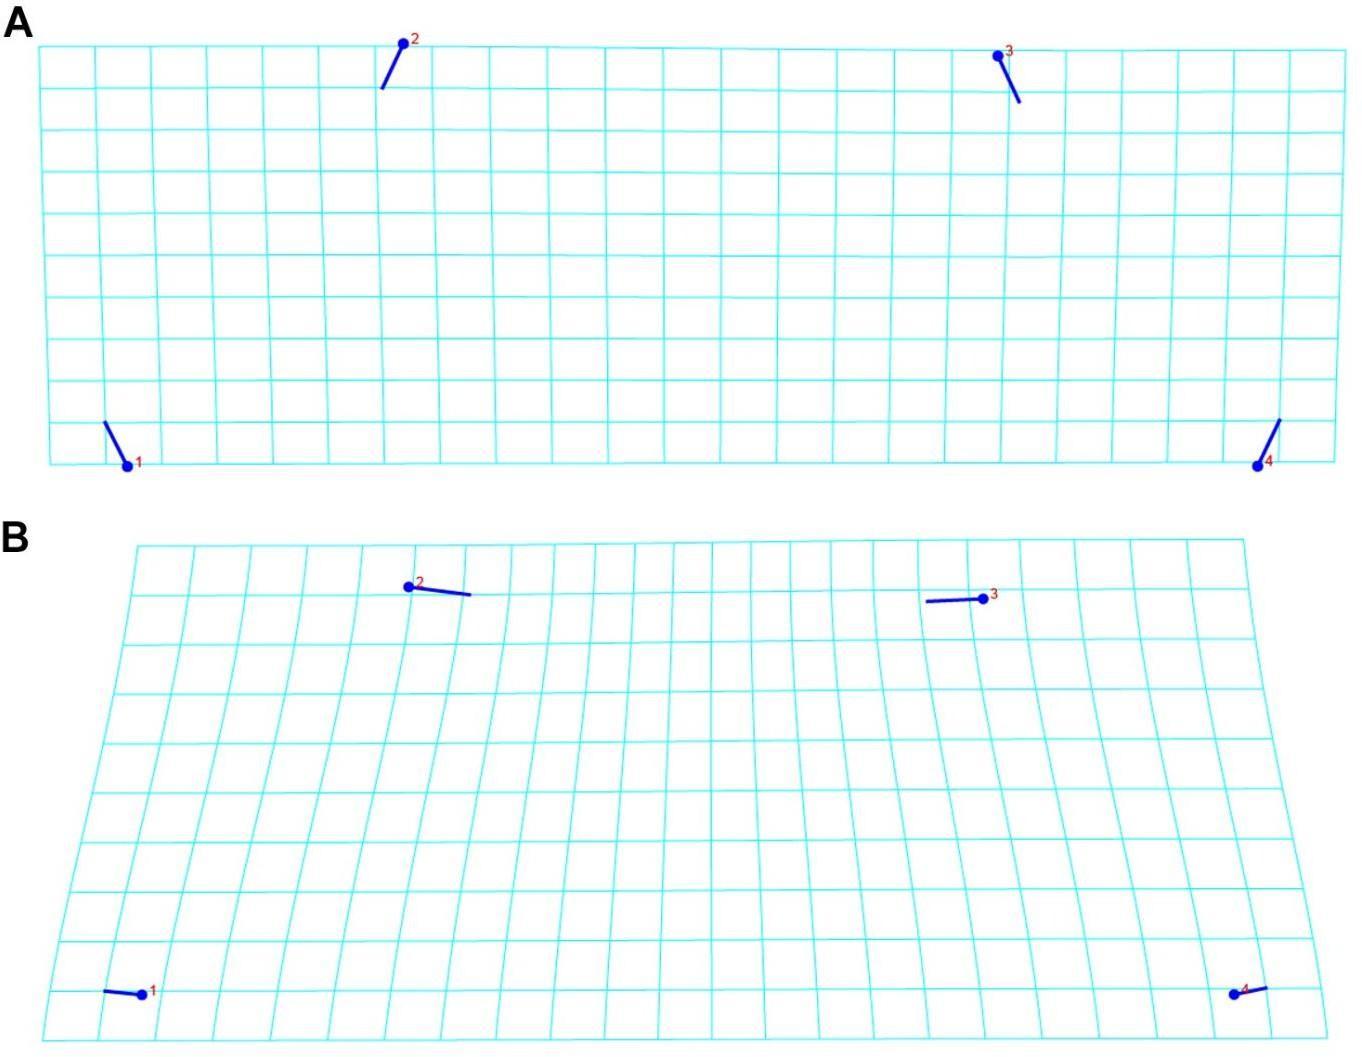


Figure S2. Transformation grid of labium. (A) Warp grid represents principal component 1 (PC1). (B) Warp grid represents principal component 2 (PC2).


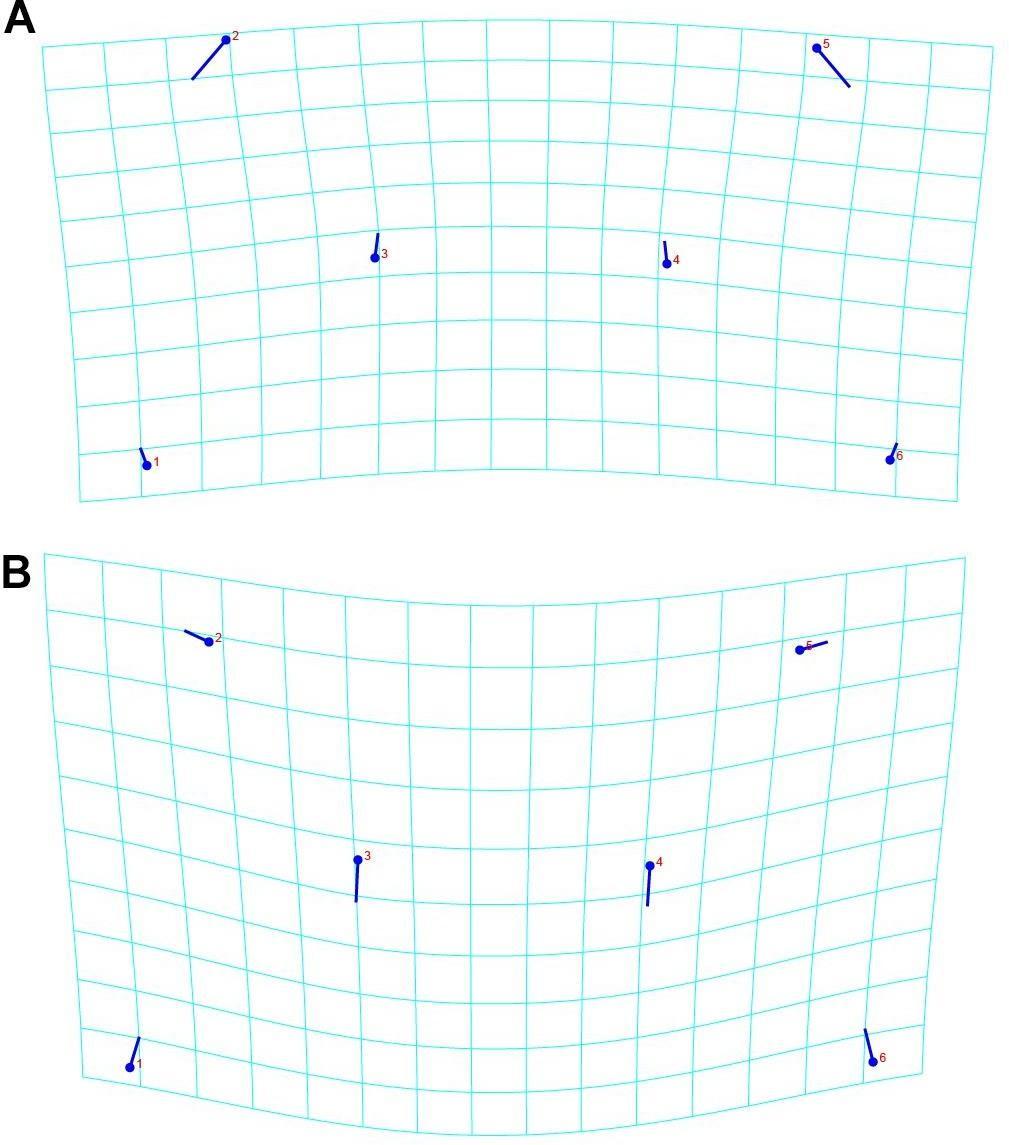


Figure S3. Transformation grid of eye arrangement. (A) Warp grid represents principal component 1 (PC1). (B) Warp grid represents principal component 2 (PC2).

**Supplementary Material 4**

**Table S4. Discriminant analysis and cross-validation comparing groups of Barychelidae (Group 1) and Theraphosidae (Group 2). * p-value: <0.001; ** p-value: 0.0024.**

| Character | Groups comparated | Analysis | Group 1 | Group 2 | Total |
| --- | --- | --- | --- | --- | --- |
| Maxilla | Barychelidae¹ X Theraphosidae²* | DA | 155 | 22 | 177 |
| 4 | 70 | 74 |
| CV | 154 | 23 | 177 |
| 5 | 69 | 74 |
| Barychelinae¹ X Sasoninae²* | DA | 104 | 25 | 129 |
| 10 | 38 | 48 |
| CV | 101 | 28 | 129 |
| 10 | 38 | 48 |
| *Sason*¹ X Neotropical Sasoninae²* | DA | 22 | 1 | 23 |
| 3 | 22 | 25 |
| CV | 21 | 2 | 23 |
| 5 | 20 | 25 |
| *Cyrtogrammomma¹* X Theraphosidae²* | DA | 9 | 3 | 12 |
| 10 | 52 | 62 |
| CV | 9 | 3 | 12 |

|  |  |  | 10 | 52 | 62 |
| --- | --- | --- | --- | --- | --- |
| Labium | Barychelidae¹ X Theraphosidae²** | DA | 104 | 72 | 176 |
| 28 | 47 | 75 |
| CV | 102 | 74 | 176 |
| 33 | 42 | 75 |
| Barychelinae¹ X Sasoninae²* | DA | 121 | 7 | 128 |
| 5 | 43 | 48 |
| CV | 119 | 9 | 128 |
| 7 | 41 | 48 |
| *Sason*¹ X Neotropical Sasoninae²* | DA | 23 | 0 | 23 |
| 2 | 23 | 25 |
| CV | 22 | 1 | 23 |
| 5 | 21 | 25 |
| *Cyrtogrammomma¹* X Theraphosidae²* | DA | 11 | 1 | 12 |
| 13 | 50 | 63 |
| CV | 11 | 1 | 12 |
| 14 | 49 | 63 |
| Eye arrangement | Barychelidae¹ X Theraphosidae²* | DA | 149 | 31 | 180 |

|  |  |  | 9 | 66 | 75 |
| --- | --- | --- | --- | --- | --- |
| CV | 148 | 32 | 180 |
| 12 | 63 | 75 |
| Barychelinae¹ X Sasoninae²* | DA | 126 | 5 | 131 |
| 1 | 48 | 49 |
| CV | 124 | 7 | 131 |
| 4 | 45 | 49 |
| *Sason*¹ X Neotropical Sasoninae²* | DA | 24 | 0 | 24 |
| 0 | 25 | 25 |
| CV | 24 | 0 | 24 |
| 0 | 24 | 25 |
| *Cyrtogrammomma¹* X Theraphosidae²* | DA | 12 | 0 | 12 |
| 0 | 63 | 63 |
| CV | 12 | 0 | 12 |
| 63 | 0 | 63 |

**Table S4.1.** Discriminant function. Tests performed in the discriminant function analysis (non-significant results are indicated with *)

| Theraphosidae x Barychelidae | | | Barychelinae x Sasoninae | | |
| --- | --- | --- | --- | --- | --- |
| Character | Test | Value | Character | Test | Value |
| Maxilla | Procrustes distance | 0.06607112 | Maxilla | Procrustes distance | 0.04327886 |
| Mahalanobis distance | 2.1807 | Mahalanobis distance | 1.8330 |
| T-square | 2.481583 | T-square | 117.5365 |
| Labium | Procrustes distance | 0.01702730* | Labium | Procrustes distance | 0.09460153 |
| Mahalanobis distance | 0.5720 | Mahalanobis distance | 2.5921 |
| T-square | 17.2063 | T-square | 234.5617 |
| Eye arrangement | Procrustes distance | 0.21201597 | Eye arrangement | Procrustes distance | 0.28033659 |
| Mahalanobis distance | 1.9924 | Mahalanobis distance | 3.2397 |
| T-square | 210.1525 | T-square | 374.2840 |
| *Sason* x Neotropical Sasoninae | | | *Cyrtogrammomma* x Theraphosidae | | |
| Character | Test | Value | Character | Test | Value |
| Maxilla | Procrustes distance | 0.08745532 | Maxilla | Procrustes distance | 0.03930683 |

|  | Mahalanobis distance | 2.2999 |  | Mahalanobis distance | 1.9497 |
| --- | --- | --- | --- | --- | --- |
| T-square | 63.3624 | T-square | 38.2175 |
| Labium | Procrustes distance | 0.15704375 | Labium | Procrustes distance | 0.06751658 |
| Mahalanobis distance | 3.2168 | Mahalanobis distance | 1.7990 |
| T-square | 123.9602 | T-square | 32.6221 |
| Eye arrangement | Procrustes distance | 0.20240008 | Eye arrangement | Procrustes distance | 0.31759764 |
| Mahalanobis distance | 6.0087 | Mahalanobis distance | 10.9515 |
| T-square | 442.1014 | T-square | 1208.9433 |

**Table S4.2.** Canonical Variate Analysis. Tests performed in the Canonical Variate Analysis (non-significant results are indicated with *).

| **Maxillae** | | | | | | | | | | |
| --- | --- | --- | --- | --- | --- | --- | --- | --- | --- | --- |
| **Mahalanobis distances** | | | | |  | **Procrustes distances** | | | | |
|  | **Barychelinae** | ***Cyrtogrammomma*** | ***Sason*** | **Neotropical Sasoninae** |  |  | **Barychelinae** | ***Cyrtogrammomma*** | ***Sason*** | **Neotropical Sasoninae** |
| ***Cyrtogrammomma*** | 2,0552 |  |  |  |  | ***Cyrtogrammomma*** | 0,0531 |  |  |  |
| ***Sason*** | 2,5429 | 3,1295 |  |  |  | ***Sason*** | 0,0647 | 0,0822 |  |  |
| **Neotropical Sasoninae** | 2,2522 | 1,5074 | 3,1929 |  |  | **Neotropical Sasoninae** | 0,0584 | 0,0382 | 0,0875 |  |
| **Theraphosidae** | 2,8515 | 1,6092 | 4,3878 | 1,6889 |  | **Theraphosidae** | 0,0737 | 0,0393 | 0,1148 | 0,0411 |
| **Labium** | | | | | | | | | | |
| **Mahalanobis distances** | | | | |  | **Procrustes distances** | | | | |
|  | **Barychelinae** | ***Cyrtogrammomma*** | ***Sason*** | **Neotropical Sasoninae** |  |  | **Barychelinae** | ***Cyrtogrammomma*** | ***Sason*** | **Neotropical Sasoninae** |
| ***Cyrtogrammomma*** | 1,2975 |  |  |  |  | ***Cyrtogrammomma*** | 0,0537 |  |  |  |
| ***Sason*** | 2,8398 | 4,0457 |  |  |  | ***Sason*** | 0,1038 | 0,1554 |  |  |
| **Neotropical Sasoninae** | 3,0765 | 3,8115 | 2,483 |  |  | **Neotropical Sasoninae** | 0,1382 | 0,1424 | 0,157 |  |
| **Theraphosidae** | 0,812 | 1,8044 | 2,3569 | 2,6101 |  | **Theraphosidae** | 0,025 | 0,0675 | 0,0891 | 0,1228 |
| **Eye arrangement** | | | | | | | | | | |
| **Mahalanobis distances** | | | | |  | **Procrustes distances** | | | | |
|  | **Barychelinae** | ***Cyrtogrammomma*** | ***Sason*** | **Neotropical Sasoninae** |  |  | **Barychelinae** | ***Cyrtogrammomma*** | ***Sason*** | **Neotropical Sasoninae** |
| ***Cyrtogrammomma*** | 1,9311 |  |  |  |  | ***Cyrtogrammomma*** | 0,0433* |  |  |  |
| ***Sason*** | 2,8868 | 3,3765 |  |  |  | ***Sason*** | 0,1865 | 0,1706 |  |  |
| **Neotropical Sasoninae** | 6,8801 | 7,0811 | 5,0508 |  |  | **Neotropical Sasoninae** | 0,3751 | 0,3556 | 0,2024 |  |
| **Theraphosidae** | 6,1817 | 6,2096 | 4,4853 | 1,4232 |  | **Theraphosidae** | 0,3377 | 0,3176 | 0,1707 | 0,0444 |
